# Supplementary material for: Cognitive Decline and BPSD Are Concomitant with Autophagic and Synaptic Deficits Associated with G9a Alterations in Aged SAMP8 Mice
Source: Cells. 2022 Aug 21;11(16):2603. doi: 10.3390/cells11162603 (PMC9406492; doi:10.3390/cells11162603)
Supplement: Supplementary file 1 [file cells-11-02603-s001.zip › Table S1.pdf]

**Table S1.** Primers used in qPCR studies.

Syber Green Primers

| Target         | Forward primer (5'-3') | Reverse primer (5'-3') |
|----------------|------------------------|------------------------|
| <i>NT3</i>     | CAGGGTGAAGGGGAAAAC     | AGTTCGGTCATTCACTCTCGC  |
| <i>G9a</i>     | CCAGAGGAGTGAATGGTGT    | CTTTCGGTGGCCATACACTT   |
| <i>Dnmt3a</i>  | ACGCCAAAGAAGTGTCTGCT   | CTTTGCCCTGCTTTATGGAG   |
| <i>Comt</i>    | CCCTCCTGTCGGATTACTCA   | GGGGGAAGCACATGAGTCTA   |
| <i>Zif-268</i> | TCAGCCTAGTCAGTGGCCTT   | AGGTCTCCCTGTTGTTGTGG   |
| <i>cFos</i>    | CCCGTAGACCTAGGGAGGAC   | CAATACACTCCATGCGGTTG   |
| <i>Bdnf</i>    | TGCGAGTATTACCTCCGCCAT  | TCACGTGCTCAAAAGTGTCAG  |
| <i>Ngf</i>     | GGAGCGCATCGAGTGA       | CCTCACTGCGGCCAGTATAG   |
| <i>TrkA</i>    | CTCCTTCTCGCCAGTGGAC    | TGCCCTCAGTAGGGGAAAGA   |
| <i>TrkB</i>    | CGTCACTTCGCCAGCAGTAG   | CTATACGCCAGGCACCACTC   |
| <i>β-Actin</i> | CAACGAGCGGTTCCGAT      | GCCACAGGTTCCATACCCA    |
