# Supplementary material for: Cognitive Decline and BPSD Are Concomitant with Autophagic and Synaptic Deficits Associated with G9a Alterations in Aged SAMP8 Mice
Source: Cells. 2022 Aug 21;11(16):2603. doi: 10.3390/cells11162603 (PMC9406492; doi:10.3390/cells11162603)
Supplement: Supplementary file 1 [file cells-11-02603-s001.zip › Table S2.pdf]

**Table S2.** Antibodies used in Western blot studies.

| <b>Antibody</b>                            | <b>Host</b> | <b>Source/Catalog</b> | <b>WB dilution</b> |
|--------------------------------------------|-------------|-----------------------|--------------------|
| <b>GAPDH</b>                               | Mouse       | Millipore/MAB374      | 1:2000             |
| <b>JNK</b>                                 | Mouse       | Santa Cruz/sc-7345    | 1:500              |
| <b>p-JNK</b>                               | Rabbit      | Cell Signalling/#9251 | 1:1000             |
| <b>Beclin-1</b>                            | Rabbit      | Cell Signalling/#3738 | 1:1000             |
| <b>p-62</b>                                | Mouse       | Santa Cruz/sc-28359   | 1:500              |
| <b>LC3B</b>                                | Rabbit      | Cell Signalling/2775  | 1:1000             |
| <b>ERK</b>                                 | Rabbit      | Cell Signalling/9102  | 1:1000             |
| <b>p-ERK</b>                               | Rabbit      | Cell Signalling/9101  | 1:1000             |
| <b>Goat-anti-mouse HRP<br/>conjugated</b>  |             | BioRad/170-5047       | 1:2000             |
| <b>Goat-anti-rabbit HRP<br/>conjugated</b> |             | BioRad/170-6515       | 1:2000             |
