# Supplementary material for: Cognitive Decline and BPSD Are Concomitant with Autophagic and Synaptic Deficits Associated with G9a Alterations in Aged SAMP8 Mice
Source: Cells. 2022 Aug 21;11(16):2603. doi: 10.3390/cells11162603 (PMC9406492; doi:10.3390/cells11162603)
Supplement: Supplementary file 1 [file cells-11-02603-s001.zip › Table S3.pdf]

**Table S3.** Parameters measured in the Elevated Plus Maze (EPM) in male SAMR1 and SAMP8 mice at 12 months of age. (n): number of events. Results are expressed as a mean  $\pm$  Standard error of the mean (SEM). \*\*\*p<0.001; \*\*\*\*p<0.0001.

|                                       | <b>SAMR1</b>       | <b>SAMP8</b>          |
|---------------------------------------|--------------------|-----------------------|
| <b>Locomotor activity (cm)</b>        | 789.55 $\pm$ 44.21 | 892.42 $\pm$ 39.05    |
| <b>Rearings (n)</b>                   | 10.33 $\pm$ 0.79   | 1.92 $\pm$ 0.36 ****  |
| <b>Time in Zone (%) - Center</b>      | 61.21 $\pm$ 5.05   | 36.89 $\pm$ 1.74 ***  |
| <b>Time in Zone (%) - Open Arms</b>   | 2.92 $\pm$ 0.56    | 17.06 $\pm$ 2.86 **** |
| <b>Time in Zone (%) - Closed Arms</b> | 35.54 $\pm$ 5.04   | 45.63 $\pm$ 2.52      |
