# Supplementary material for: Cognitive Decline and BPSD Are Concomitant with Autophagic and Synaptic Deficits Associated with G9a Alterations in Aged SAMP8 Mice
Source: Cells. 2022 Aug 21;11(16):2603. doi: 10.3390/cells11162603 (PMC9406492; doi:10.3390/cells11162603)
Supplement: Supplementary file 1 [file cells-11-02603-s001.zip › Table S4.pdf]

**Table S4.** Parameters measured in the Open Field Test (OFT) in male SAMR1 and SAMP8 mice at 12 months of age. (n): number of events. Results are expressed as a mean  $\pm$  Standard error of the mean (SEM). \*p<0.05; \*\*p<0.01; \*\*\*\*p<0.0001.

|                                  | <b>SAMR1</b>        | <b>SAMP8</b>          |
|----------------------------------|---------------------|-----------------------|
| <b>Locomotor activity (cm)</b>   | 1476.18 $\pm$ 85.68 | 1870.07 $\pm$ 118.8 * |
| <b>Rearings (n)</b>              | 4.7 $\pm$ 1.08      | 31.17 $\pm$ 2.41 **** |
| <b>Time in Zone (%) - Border</b> | 61.93 $\pm$ 5.42    | 79.63 $\pm$ 1.83 **   |
